# Supplementary material for: The inner junction complex of the cilia is an interaction hub that involves tubulin post-translational modifications
Source: eLife journal article supplement (doi:10.7554/elife.52760), 2020-01-17
Supplement: supp [file elife_poa_e52760_Transparent_Reporting_File.docx]

***eLife’s* transparent reporting form**

We encourage authors to provide detailed information *within their submission* to facilitate the interpretation and replication of experiments. Authors can upload supporting documentation to indicate the use of appropriate reporting guidelines for health-related research (see [EQUATOR Network](http://www.equator-network.org/%20)), life science research (see the [BioSharing Information Resource](https://biosharing.org/)), or the [ARRIVE guidelines](http://www.plosbiology.org/article/info:doi/10.1371/journal.pbio.1000412) for reporting work involving animal research. Where applicable, authors should refer to any relevant reporting standards documents in this form.

If you have any questions, please consult our Journal Policies and/or contact us: [editorial@elifesciences.org](mailto:editorial@elifesciences.org).

**Sample-size estimation**

- You should state whether an appropriate sample size was computed when the study was being designed
- You should state the statistical method of sample size computation and any required assumptions
- If no explicit power analysis was used, you should describe how you decided what sample (replicate) size (number) to use

Please outline where this information can be found within the submission (e.g., sections or figure legends), or explain why this information doesn’t apply to your submission:

Material and Methods:

No explicit power analysis was used. Approximately ~9500 micrographs were used to collect ~270,000 particles for single particle analysis.

**Replicates**

- You should report how often each experiment was performed
- You should include a definition of biological versus technical replication
- The data obtained should be provided and sufficient information should be provided to indicate the number of independent biological and/or technical replicates
- If you encountered any outliers, you should describe how these were handled
- Criteria for exclusion/inclusion of data should be clearly stated
- High-throughput sequence data should be uploaded before submission, with a private link for reviewers provided (these are available from both GEO and ArrayExpress)

Please outline where this information can be found within the submission (e.g., sections or figure legends), or explain why this information doesn’t apply to your submission:

Materials and Methods:

The same FAP52 mutant Chlamydomonas were grown and purified from three separate 1L cultures. Purified doublet microtubules were aliquoted into three respective tubes where each was analyzed via mass spectrometry for a total of 3 biological replicates. The same process and conditions was used when preparing wild-type flagella for mass spectrometry (Table 1).

**Statistical reporting**

- Statistical analysis methods should be described and justified
- Raw data should be presented in figures whenever informative to do so (typically when N per group is less than 10)
- For each experiment, you should identify the statistical tests used, exact values of N, definitions of center, methods of multiple test correction, and dispersion and precision measures (e.g., mean, median, SD, SEM, confidence intervals; and, for the major substantive results, a measure of effect size (e.g., Pearson's r, Cohen's d)
- Report exact p-values wherever possible alongside the summary statistics and 95% confidence intervals. These should be reported for all key questions and not only when the p-value is less than 0.05.

Please outline where this information can be found within the submission (e.g., sections or figure legends), or explain why this information doesn’t apply to your submission:

Materials and Methods.

The MS result parameters were set to 99% protein threshold, Minimum number of peptides was 2 and a peptide threshold of 95%. From this FAP52 and wild type mass spectrometry results were normalized and the quantitative values were used in a two-tailed T-test to measure if the distance between their means could occur by chance. The result was reported as a p-value (table 1)

Figure 6 F-H. Protofilaments pair angles were averaged from six measurements from protofilaments pairs every 48nm (figure 6F). Correlation graphs were plotted from consensus normalized expressions levels from paired genes. Correlations coefficients were calculated and the r value was reported. (figure 6G, H)

Table 2 Average quantitative values for any given proteins was calculated from the average of a proteins quantitative value after normalization from three biological replicates.

(For large datasets, or papers with a very large number of statistical tests, you may upload a single table file with tests, Ns, etc., with reference to sections in the manuscript.)

**Group allocation**

- Indicate how samples were allocated into experimental groups (in the case of clinical studies, please specify allocation to treatment method); if randomization was used, please also state if restricted randomization was applied
- Indicate if masking was used during group allocation, data collection and/or data analysis

Please outline where this information can be found within the submission (e.g., sections or figure legends), or explain why this information doesn’t apply to your submission:

Materials and methods and table 1 and 2. Wild type and FAP52-KO were cultured and purified under identical condition. Samples were divided into two groups based on the mutation in FAP52. Results were allocated for analysis based on this difference.

**Additional data files (“source data”)**

- We encourage you to upload relevant additional data files, such as numerical data that are represented as a graph in a figure, or as a summary table
- Where provided, these should be in the most useful format, and they can be uploaded as “Source data” files linked to a main figure or table
- Include model definition files including the full list of parameters used
- Include code used for data analysis (e.g., R, MatLab)
- Avoid stating that data files are “available upon request”

Please indicate the figures or tables for which source data files have been provided:
